# Supplementary material for: Bioinformatic analysis of beta carbonic anhydrase sequences from protozoans and metazoans
Source: PubMed Central journal article supplement (PMC3907363; doi:10.1186/1756-3305-7-38), 2014-01-21
Supplement: 1756-3305-7-38-S1.pdf [file 1756-3305-7-38-S1.pdf]

Supplementary Figure 1. Multiple sequence alignment of all 75  $\beta$ -CAs in metazoan and protozoan species with  $\beta$ -CA of *Pelosinus fermentans* (a bacterial out group).  $\beta$ -CAs contain two highly conserved active site motifs, CxDxR as well as HxxC (C=Cysteine, D=Aspartic acid, R=Arginine, H=Histidine, C=Cysteine) which are indicated by arrows. Alignment was visualized in Jalview [53].

EIW34693\_Pelosinus\_fermentans-BCA 1 -----MQLVEQLAANQTF TKNLS - -DQFV - - - - -HYFSEPS - KLPRQL 37  
 F4WAG3\_Acromyrmex\_echinator-BCA 1 -----MDKILKGIMKYRKCH - -REGMV - - - - -KQFQVVK - DHPPEKA 34  
 J9K706\_Acyrtosiphon\_pisum-BCA1 1 -----MDRIFRGIMKYRRTN - -RGKMV - - - - -EQFQVVK - NHPPEKA 34  
 C4WVD8\_Acyrtosiphon\_pisum-BCA2 1 -----MDRIFRGIMKYRRTN - -RAKMV - - - - -EQFQVVK - NNPEKA 34  
 J9JZY3\_Acyrtosiphon\_pisum-BCA3 1 -----MDRIFRGIMKYRRTN - -RAKMV - - - - -EQFQVVK - NNPEKA 34  
 D4NWE5\_Adineta\_vaga-BCA2 1 -----MNRILDGIMQYRQTL - -RPTLL - - - - -EEFKVA - LGPSVRS 34  
 Q17N64\_Aedes\_aegypti-BCA 1 -----MERILRGVMRYRNTT - -REQMV - - - - -KEFKQVR - DNPPEKA 34  
 FC551456\_Ancylostoma\_caninum-BCA 1 -----MPGLHKV LQGI VFKRQTA - -RKELV - - - - -KEFEQIR - NNPEPTA 37  
 E3X5Q8\_Anopheles\_darlingi-BCA 1 -----MYRK - RLHI - - RWYDR - - - - -AAASII V I A I L I I N G S E S W S A Y C E V C V T G T P P G S K W Y R S F V - - K F A I I H R V G S W A W D T A S F S C L S S V - C S S S P K A 86  
 Q5TU56\_Anopheles\_gambiae-BCA 1 -----MERILRGVMRYRHTT - -REQMV - - - - -MERILRGVMRYRHTT - -REQMV - - - - -KEFKQVR - DNPPEKA 34  
 H9K529\_Apis\_mellifera-BCA 1 -----MDKILKGIMKYRKCH - -REEMV - - - - -KQFQVVK - DCPEKA 34  
 F1LE18\_Ascaris\_suum-BCA 1 -----MSAFAKILKGVVFKRHGP - -RGSAL - - - - -KKLQEK - KHGHPA 37  
 G0MSW4\_Caenorhabditis\_brenneri-BCA1 1 -----MNRILRGVIQFRNTI - -RKDLV - - - - -KQFEVVK - NNPSPTA 37  
 G0MRG1\_Caenorhabditis\_brenneri-BCA2 1 -----MPGLQKILNGVIRFRQTV - -RKDLV - - - - -KQFEHIR - DNPHTA 37  
 A8XKV0\_Caenorhabditis\_briggsae-BCA1 1 -----MNRILRGVIQYQNKI - -KAGLV - - - - -KQFEHVS - DHPNPTA 37  
 A8WN21\_Caenorhabditis\_briggsae-BCA2 1 -----MPGLQKILNGVIRFRQTV - -RKDLV - - - - -KQFEQVR - DNPPEKA 34  
 Q22460\_Caenorhabditis\_elegans-BCA1 1 -----MNRILRGVIQFRNTI - -RKDLV - - - - -KQFEVVK - NNPSPTA 37  
 Q2YS41\_Caenorhabditis\_elegans-BCA2 1 -----MPGLERILNGVIRFRQTV - -RKDLV - - - - -KQFEHIR - DNPHTA 37  
 E3LDN3\_Caenorhabditis\_remanei-BCA1 1 -----MNRILRGVIQYQNKI - -KAGLV - - - - -KQFEHVS - DHPNPTA 37  
 E3MK96\_Caenorhabditis\_remanei-BCA2 1 -----MPGLQKILNGVIRFRQTV - -RKDLV - - - - -KQFEQVR - DNPPEKA 34  
 C1C2M7\_Caligus\_clemensi-BCA 1 -----MDKVLRGILQYNRS AK - -KQVVK - DNPPEKA 34  
 E2ANQ9\_Camponotus\_floridanus-BCA 1 -----MDRILKGIMKYRKCH - -REGMV - - - - -KQFQVR - DHPPEKA 34  
 B0WKV7\_Culex\_quinquefasciatus-BCA 1 -----MDRILRGVMRYRNTT - -REQMV - - - - -KEFKQVR - DNPPEKA 34  
 G6D7Z4\_Danaus\_plexippus-BCA 1 -----MDRILRGIMRYRVL D - -RATMV - - - - -KQFQVVK - DNPPEKA 34  
 E9GLB5\_Daphnia\_pulex-BCA 1 -----MDKILKGILKYRKY - -RTMV - - - - -EQKQVA - DRPEKA 34  
 J3JTM9\_Dendroctonus\_ponderosae-BCA 1 -----MDKILKGIMKYRSTV - -KDTMV - - - - -QQFVVK - DNPPEKA 34  
 B3LZ10\_Drosophila\_ananassae-BCA 1 -----MERILRGIMRYRNTT - -REQMV - - - - -KEFKQVR - DNPPEKA 34  
 B3P1V8\_Drosophila\_erecta-BCA 1 -----MERILRGIMRYRNTT - -REQMV - - - - -KEFKQVR - DNPPEKA 34  
 B4JHY1\_Drosophila\_grimshawi-BCA 1 -----MERILRGVMRYRNTT - -REQMV - - - - -KEFKQVR - DNPPEKA 34  
 Q9VHJ5\_Drosophila\_melanogaster-BCA 1 -----MERILRGIMRYRNTT - -REQMV - - - - -KEFKQVR - DNPPEKA 34  
 B4KDC1\_Drosophila\_mojavensis-BCA 1 -----MERILRGIMRYRNTT - -REQMV - - - - -KEFKQVR - DNPPEKA 34  
 B4GFA1\_Drosophila\_persimilis-BCA 1 -----MERILRGVMRYRNTT - -REQMV - - - - -KEFKQVR - DNPPEKA 34  
 Q296E4\_Drosophila\_pseudoobscura-BCA 1 -----MERILRGVMRYRNTT - -REQMV - - - - -KEFKQVR - DNPPEKA 34  
 B4HKY7\_Drosophila\_sechellia-BCA 1 -----MERILRGIMRYRNTT - -REQMV - - - - -KEFKQVR - DNPPEKA 34  
 B4QXC5\_Drosophila\_simulans-BCA 1 -----MERILRGIMRYRNTT - -REQMV - - - - -KEFKQVR - DNPPEKA 34  
 B4LZE7\_Drosophila\_virilis-BCA 1 -----MERILRGIMRYRNTT - -REQMV - - - - -KEFKQVR - DNPPEKA 34  
 B4NBB9\_Drosophila\_willistoni-BCA 1 -----MERILRGIMRYRNTT - -REQMV - - - - -KEFKQVR - DNPPEKA 34  
 B4PTY0\_Drosophila\_yakuba-BCA 1 -----MERILRGIMRYRNTT - -REQMV - - - - -KEFKQVR - DNPPEKA 34  
 B0E7M0\_Entamoeba\_dispar-BCA 1 -----MERILRGIMRYRNTT - -REQMV - - - - -KEFKQVR - DNPPEKA 34  
 C4LXK3\_Entamoeba\_histolytica-BCA 1 -----MTQLTPQQALTFLLDGNRRFVEGKTIYNF - - - - -ERRKELI - NKQEP 45  
 K2GQM0\_Entamoeba\_nuttalli-BCA 1 -----MTQLTPQQALTFLLDGNRRFVEGKTIYNF - - - - -ERRKELI - NKQEP 45  
 E2B2Q1\_Harpegnathos\_saltator-BCA 1 -----MDRILKGIMKYRKCH - -REGMV - - - - -KQFQVVK - DNPPEKA 34  
 HMELO15257\_Heliconiuss\_melpomene-BCA 1 -----MDRILRGIMRYRVL D - -RASMV - - - - -KQFQVVK - DNPPEKA 34  
 EY481200\_Hirudo\_medicinalis-BCA 1 -----MPGLDKLKGILLYRSTI - -QPHVV - - - - -KQFQVVK - DNPPEKA 37  
 G0QPN9\_Ichthyophthirius\_multifiliis-BCA 1 -----MQLSKNNIQWSEKIK - -NEDP - - - - -LFEKLA - KTQSPK 34  
 E9B8S3\_Leishmania\_donovani-BCA 1MSLCSGCGPHTKPTLDVPSMYFSTTPELLCNRNMSEPSANATLTKKELASLVGGRL - - - - -VQSVQREQPPRGSGIQPLDFNKHWAAGEIV - -QLNP - - - - -DYVELA - KQKQPY 105  
 A4HSV2\_Leishmania\_infantum-BCA 1MSLCSGCGPHTKPTLDVPSMYFSTTPELLCNRNMSEPSANATLTKKELASLVGGRL - - - - -VQSVQREQPPRGSGIQPLDFNKHWAAGEIV - -QLNP - - - - -DYVELA - KQKQPY 105  
 Q4QJ17\_Leishmania\_major-BCA 1MSLCSGCGPHTKPTLDVPSMYFSTTPELLCNRNMSEPSANATLTKKELANLVGGRL - - - - -VQSVQREQPPRGSGIQPLDFNKHWAAGEIV - -QLNP - - - - -DYVELA - KQKQPY 105  
 E9AKU0\_Leishmania\_mexicana-BCA 1MSLCSGCGPHTKPTLDVPSMYFSTTPELLCNRNMSEPSANATLTKKELASLVGGRL - - - - -VQSVQREQPPRGSGIQPLDFNKHWAAGEIV - -QLNP - - - - -DYVELA - KQKQPY 105  
 D3PI48\_Lepeophtheirus\_salmonis-BCA1 1 -----MEKVFRIIRYKNAY - -KDDVF - - - - -TKLSKIKESGSSPS 35  
 K7IWK8\_Nasonia\_vitripennis-BCA 1 -----MDRILKGVVMKYRKCH - -REGMV - - - - -KQFQVVK - DHPPEKA 34  
 A7S717\_Nematostella\_vectensis-BCA 1 -----MEKILQGVVFRHVL - -RPSLL - - - - -PSLREVA - EKVA 34  
 A0BD61\_Paramecium\_tetraurelia-BCA1 1 -----MNQIVSNIQEI THYNRVLEGNRRYVAKKL - -ASDD - - - - -MNQIVSNIQEI THYNRVLEGNRRYVAKKL - -ASDD - - - - -NYFKNLS - KGQSPKY 49  
 A0E8J0\_Paramecium\_tetraurelia-BCA2 1 -----MNQIVSNIQEI SEMKKYAKALQGNKRYVAKKT - -AEDP - - - - -EYFRKLS - TGQNPKY 49  
 A0CEX6\_Paramecium\_tetraurelia-BCA3 1 -----MNQIVSNIQEI RFSQYNRVLEGNRIYVEKKM - -AIYY - - - - -QYFRKLS - QQTTPKY 49  
 A0BDB1\_Paramecium\_tetraurelia-BCA4 1 -----MQQTIVHSIEEYKLYNKVLEGNKSYVKKKL - -AQDE - - - - -DYFRKLA - KGQNPKY 49  
 A0C922\_Paramecium\_tetraurelia-BCA5 1 -----MNQIVSNIQEI INHYNRVLEGNKRYVAKKM - -AEDP - - - - -SYFKTLS - KGQNPKY 49  
 187043763\_Saccoglossus\_kowalevskii-BCA 1 -----MPGMEKLLRGVLYRNGV - -RQELV - - - - -PQERVR - DNPPEKA 37  
 G4V6B2\_Schistosoma\_mansoni-BCA 1 -----MNQILGLIKSHANK - -QSFL - - - - -NQLKTFN - EKP 33  
 E9IP13\_Solenopsis\_invicta-BCA 1 -----MDRILKGIMKYRKCH - -REGMV - - - - -KQFQVVK - DHPPEKA 34  
 SMAR006741\_Strigamia\_maritima-BCA 1 -----MNVAPQHVGIVKVLRGIRYRHF - -REKMV - - - - -KQFQVVK - DHPPEKA 44  
 H3I177\_Strongylocentrotus\_purpuratus-BCA 1 -----MNGGSRVGRALVQVCRFFSSKPGVT - - - - -SQTRPFQVGLKPL 42  
 Q22U21\_Tetrahymena\_thermophila-BCA1 1 -----MNPIN - -QADQQQLQTHGIDSLQYNKRWAAQIQ - -VEDP - - - - -KFERLA - KTO 51  
 Q22U16\_Tetrahymena\_thermophila-BCA2 1 -----MNPIN - -QADQQQLQTHGIDALQYNKRWAAQIQ - -VEDP - - - - -KFORLA - KTO 51  
 I7MDL7\_Tetrahymena\_thermophila-BCA3 1 -----MALRKLSSSTF - -KASLSSQALRYKDIRLQNNINWSEKIK - -VEDP - - - - -EYFQLA - KAQHPKY 59  
 I7LWM1\_Tetrahymena\_thermophila-BCA4 1 -----IQMNSFRKLLKGGP - -FSYCLQNKRISEIQRLQNNVEVSKNI - -KEDP - - - - -KFDKLA - KQTPKY 73  
 I7M0M0\_Tetrahymena\_thermophila-BCA5 1 -----MDQKVQPRKTD MFHSDQ - -EDNHNDYFCQGEIDDLQYNKNWAYKIQ - -HEDP - - - - -SFNKL A - KAQNP 64  
 I7MD92\_Tetrahymena\_thermophila-BCA6 1 -----MDEYKLLIQNNREWAAKMR - -IEDP - - - - -QFNLTS - KEIEHKY 37  
 I7M748\_Tetrahymena\_thermophila-BCA7 1 -----MSS T - -NQQQDKKQ TCHGCCLHNDQNEFTFDFCKGDD EDAGIDRLQYNQKWAQIIL - -TQDP - - - - -TFTELA - KQTPDY 73  
 Q23AV1\_Tetrahymena\_thermophila-BCA8 1 -----MNP - - - - -DFPGLA - QQTTPKY 17  
 D6WK56\_Tribolium\_castaneum-BCA 1 -----MDRILKGIMRYRNVK - -KEKMV - - - - -KQKEVK - DHPPEKA 34  
 E5SH53\_Trichinella\_spiralis-BCA 1 -----MRKLLNGVVKYRETA - -RSQVL - - - - -KRLRQVK - ED 34  
 A2ENQ8\_Trichomonas\_vaginalis-BCA1 1 -----MSQLELITSA NQAFLEAN - - - - -PELTKLN - KAPOR 32  
 A2DLG4\_Trichomonas\_vaginalis-BCA2 1 -----MYQLEKLSHDNQKFLKEH - - - - -PDLPKLN - EKQOR 32  
 B355Y1\_Trichoplax\_adhaerens-BCA 1 -----MIEKVI RGVLRYSASL - -SSANK - - - - -TLYAQVA - EKVQ 35  
 117195962\_Xenoturbella\_bocki-BCA 1 -----MPGMEKLLNGIMKFRGTI - -RNDLV - - - - -QFQVR - DNPPE 37

EIW34693\_Pelosinus\_fermentans-BCA  
F4WAG3\_Acromyrmex\_echinator-BCA  
J9K706\_Acyrthosiphon\_pisum-BCA1  
C4WV08\_Acyrthosiphon\_pisum-BCA2  
I9I2Y3\_Acyrthosiphon\_pisum-BCA3  
D4NW55\_Adineta\_vaga-BCA2  
Q17N64\_Aedes\_aegypti-BCA  
FC551456\_Ancylostoma\_caninum-BCA  
E3X5F08\_Anopheles\_darlingi-BCA  
Q5TU56\_Anopheles\_gambiae-BCA  
H9K529\_Apis\_mellifera-BCA  
F1LE18\_Ascaris\_suum-BCA  
G0MSW4\_Caenorhabditis\_brenneri-BCA1  
G0MRG1\_Caenorhabditis\_brenneri-BCA2  
A8XKV0\_Caenorhabditis\_briggsae-BCA1  
A8WN21\_Caenorhabditis\_briggsae-BCA2  
Q22460\_Caenorhabditis\_elegans-BCA1  
Q2YS41\_Caenorhabditis\_elegans-BCA2  
E3LDN3\_Caenorhabditis\_remanei-BCA1  
E3MK96\_Caenorhabditis\_remanei-BCA2  
C1C2M7\_Caligus\_clemensi-BCA  
E2AN09\_Camponotus\_floridanus-BCA  
B0WKV7\_Culex\_quinqüfasciatus-BCA  
G6D7Z4\_Danaus\_plexippus-BCA  
E9GL85\_Daphnia\_pulex-BCA  
J3JTM9\_Dendroctonus\_ponderosae-BCA  
B3LZ10\_Drosophila\_ananassae-BCA  
B3P1V8\_Drosophila\_erecta-BCA  
B4JHY1\_Drosophila\_grimshawi-BCA  
Q9VHJ5\_Drosophila\_melanogaster-BCA  
B4KDC1\_Drosophila\_mojavensis-BCA  
B4GF11\_Drosophila\_persimilis-BCA  
Q296E4\_Drosophila\_pseudoobscura-BCA  
B4HKY7\_Drosophila\_sechellia-BCA  
B4QXC5\_Drosophila\_simulans-BCA  
B4LZE7\_Drosophila\_virilis-BCA  
B4NB89\_Drosophila\_willistoni-BCA  
B4PTY0\_Drosophila\_yakuba-BCA  
B0E7M0\_Entamoeba\_dispar-BCA  
C4LXK3\_Entamoeba\_histolytica-BCA  
K2GQM0\_Entamoeba\_nuttalli-BCA  
E2B2Q1\_Harpegnathos\_saltator-BCA  
HMEL015257\_Heliconia\_melpomene-BCA  
EY481200\_Hirudo\_medicinalis-BCA  
G0QP99\_Ichthyophthirius\_multifiliis-BCA  
E9B853\_Leishmania\_donovani-BCA  
A4HSV2\_Leishmania\_infantum-BCA  
Q4QJ17\_Leishmania\_major-BCA  
E9AKU0\_Leishmania\_mexicana-BCA  
D3P148\_Lepeophtheirus\_salmonis-BCA1  
K71WK8\_Nasonia\_vitripennis-BCA  
A75717\_Nematostella\_vectensis-BCA  
A08D61\_Paramecium\_tetraurelia-BCA1  
A0E8J0\_Paramecium\_tetraurelia-BCA2  
A0CEX6\_Paramecium\_tetraurelia-BCA3  
A08DB1\_Paramecium\_tetraurelia-BCA4  
A0C922\_Paramecium\_tetraurelia-BCA5  
187043763\_Saccoglossus\_kowalevskii-BCA  
G4V6B2\_Schistosoma\_mansoni-BCA  
E9P1P3\_Solenopsis\_invicta-BCA  
SMAR006741\_Strigamia\_maritima-BCA  
H31177\_Strongylocentrotus\_purpuratus-BCA  
Q22U21\_Tetrahymena\_thermophila-BCA1  
Q22U16\_Tetrahymena\_thermophila-BCA2  
I7MDL7\_Tetrahymena\_thermophila-BCA3  
I7LWM1\_Tetrahymena\_thermophila-BCA4  
I7M0M0\_Tetrahymena\_thermophila-BCA5  
I7MD92\_Tetrahymena\_thermophila-BCA6  
I7M748\_Tetrahymena\_thermophila-BCA7  
Q23AV1\_Tetrahymena\_thermophila-BCA8  
D6WK56\_Tribolium\_castaneum-BCA  
E55H53\_Trichinella\_spiralis-BCA  
A2ENQ8\_Trichomonas\_vaginalis-BCA1  
A2DLG4\_Trichomonas\_vaginalis-BCA2  
B355Y1\_Trichoplax\_adhaerens-BCA  
117195962\_Xenoturbella\_bocki-BCA

38 A I F T C M D T R L V D F L E P A M G I K R G E A K V - - - - - I K N A G N S V T G P F E A - T - - - - - I R S L I V G I F E L G V K E V F V I G H L D C G V S H T T S Q G L T E K M - - - - - L A R G 121  
35 V F F T C M D S R M I P - - T R F T E T N I G D M F V - - - - - V R N P G N I I P H S H H F V D - - - - - E F T M C E P A A A E L G C V V N N I R H V I V C G H S D C K A M N L L Y A L R D K E - - - - - 118  
35 L F F T C M D S R M L P - - A R F T E S N V G D M F V - - - - - V R N A G N L I P H S O H F P D - - - - - E Y T S C E P A A L E L G C V H N D I R H V I V C G H S D C K A M N L L H L L R D T E - - - - - 118  
35 L F F T C M D S R M L P - - A R F T E T N I G D M F V - - - - - V R N A G N L I P H S O H F L D - - - - - E Y T T C E P A A L E L G C V H N D I R H V I V C G H S D C K A M N L L H L L R D T E - - - - - 118  
35 L F F T C M D S R M L P - - A R F T E T N I G D M F I - - - - - V R N A G N L I P H S O H F D - - - - - E Y T T C E P A A L E L G C V H N D I R H V I V C G H S D C K V - - - - - 107  
35 L L L T C V D S R V V A - S R L T Q A V P G Q L F I - - - - - V R N P G N L V P S Y D F E K - - - - - N G I V S G E C A A L E L A C S R N N V P V I A V F G H S D C K A M N L L Y R I R N E I - - - - - 119  
35 V F F T C M D S R M I P - - T R F T D H V G D M F V - - - - - I R N A G N L V P H A E H F D - - - - - E Y F S C E P A G L E L G C V V N N I K H I I V C G H S D C K A M N L L Y Q L R D P E - - - - - 118  
35 V F F T C M D S R M L P - - A R F T T S S Q V G D M F V - - - - - V R N S G N M I P H A N N Y G P - A G Y E - - - - - V S V T T E P A A L E L A V K R G H I N H V I V C G H S D C K A I N T L Y N I H E C P - - - - - 125  
35 V F F T C M D S R M I P - - T R F T E T N I G D M F V - - - - - V R N A G N L V P H A E H F D - - - - - E Y F S C E P A A L E L G C V V N N I K H I I V C G H S D C K A M N L L Y K L K D P E - - - - - 170  
35 L F F T C M D S R M I P - - A R F T E T N I G D M F V - - - - - V R N A G N L I P H S O H F P D - - - - - E Y T S C E P A A L E L G C V V N N I K H I I V C G H S D C K A M N L L Y K L K D P E - - - - - 118  
35 A F F T C M D S R M I P - - L R F T E T N V G D M F V - - - - - V R N A G N I I P H S O H F E D - - - - - E L A M C E P A A L E L V C L M N E I K H I I V C G H S D C K A M N L L Y S L R E E E - - - - - 118  
35 V F F T C M D S R M L P - - T R F T Q T E A G D M Y I - - - - - V R N G N M V P A T H F G A - C G D E - - - - - V L V A T E P A A L D L T L K R G L K H A I V C G H S D C K A M S T L Y K M H L H P - - - - - 125  
35 V M F T C M D S R M L P - - T R F T Q S Q V G D M F V - - - - - V R N A G N M I P D A P N Y G A - F - S E - - - - - V S V N T E P A A L E L A V K R G G I R H V I V C G H S D C K A I N T L Y G L H Q C P - - - - - 121  
35 V F F T C M D S R M L P - - A R I T S S Q V G D M F V - - - - - V R N S G N M I P H A N N Y G P - S G Y E - - - - - V S V T T E P A A L E L A V K R G K I N H V I V C G H S D C K A I N T L Y N L H K C P - - - - - 125  
35 V M F T C M D S R M L P - - T R F T Q S A V G D M F V - - - - - V R N A G N M I P A A P N Y G S - Y - S E - - - - - V S I N T E P A A L E L A V K R G K I R H V V V C G H S D C K A M N T L Y Q L H Q C P - - - - - 121  
35 V F F T C M D S R M L P - - A R I T S S Q V G D M F V - - - - - V R N S G N M I P H A N N Y G P - S G Y E - - - - - V S V T T E P A A L E L A V K R G K I N H V I V C G H S D C K A I N T L Y N L H K C P - - - - - 125  
35 V M F T C M D S R M L P - - T R F T Q S Q V G D M F V - - - - - V R N A G N M I P D A P N Y G A - F - S E - - - - - V S V N T E P A A L E L A V K R G G I R H V I V C G H S D C K A I N T L Y G L H Q C P - - - - - 121  
35 V F F T C M D S R M L P - - A R I T S S Q V G D M F V - - - - - V R N S G N M I P H A N N Y G P - S G Y E - - - - - V S V T T E P A A L E L A V K R G K I N H V I V C G H S D C K A I N T L Y N L H K C P - - - - - 125  
35 V M F T C M D S R M L P - - T R F T Q S R V G D M F V - - - - - V R N A G N M I P E A P T Y G T - S - S E - - - - - V S V T T E P A A L E L A V K R G G I R H V V V C G H S D C K A I N T L Y R L H Q C P - - - - - 121  
35 V F F T C M D S R M L P - - A R I T S S Q V G D M F V - - - - - V R N S G N M I P H A N N Y G P - S G Y E - - - - - V S V T T E P A A L E L A V K R G K I N H V I V C G H S D C K A I N T L Y N L H K C P - - - - - 125  
37 V L F T C M D S R I H P - - N V F M N S D I G D A F T - - - - - V R N A G N I V P K S G L V H G - L - - - - - V N P A P E P A G L E L G C V L N S I K N V I V C G H S D C K A M I A V H S L K D S N - - - - - 121  
35 V F F T C M D S R M I P - - T R F T E T N V G D M F V - - - - - V R N P G N V P H S Q H F G D - - - - - E F T M C E S A A L E L G C V V N D I R H V I V C G H S D C K A M N L L Y A L R D E E - - - - - 118  
35 V F F T C M D S R M I P - - T R Y T D H V G D M F V - - - - - V R N A G N L V P H A E H F D - - - - - E Y F S C E P A A L E L G C V V N N I K H I I V C G H S D C K A M N L L Y Q L R D P P - - - - - 118  
35 I F Y T C M D S R M I P - - T R F T E T C V G D M F V - - - - - I R N A G N L I P H S R H F V D - - - - - E M T S C E P A G L E L S C I V N D I K H V I V C G H S D C K A M N L L Y K L K S A D - - - - - 118  
35 V F F T C M D S R M L P - - T R F T Q T D V G D M F I X - - - - - V R N A G N L V P H S K L Y G I - - - - - D S A T T E P A A L E L G C I V N N K H M V V C G H S D C K A M N L L Y S F K G I - - - - - 118  
35 V F F T C I D S R M L P - - T R F T Q T N V G D M F I - - - - - I R N A G N L V P H S Q R F R D - - - - - E Q D T N E P A A L E L G C V M N D I R H I I V C G H S D C K A I N L L Y K L R D P E - - - - - 118  
35 V F F T C M D S R M I P - - T R Y T D T H V G D M F V - - - - - V R N A G N L I P H A H F Q D - - - - - E Y F S C E P A A L E L G C V V N D I R H I I V C G H S D C K A M N L L Y Q L R D P E - - - - - 118  
35 V F F T C M D S R M I P - - T R Y T D T H V G D M F V - - - - - V R N A G N L I P H A Q H F Q D - - - - - E Y F S C E P A A L E L G C V V N D I R H I I V C G H S D C K A M N L L Y Q L R D P D - - - - - 118  
35 V F F T C M D S R M I P - - T R Y T D T H V G D M F V - - - - - V R N A G N L I P H A H F H D - - - - - E Y F S C E P A A L E L G C V V N D I R H I I V C G H S D C K A M N L L Y Q L R D P E - - - - - 118  
35 V F F T C M D S R M I P - - T R Y T D T H V G D M F V - - - - - V R N A G N L I P H A Q H F Q D - - - - - E Y F S C E P A A L E L G C V V N D I R H I I V C G H S D C K A M N L L Y Q L R D P D - - - - - 118  
35 V F F T C M D S R M I P - - T R Y T D T H V G D M F V - - - - - V R N A G N L I P H A Q H F Q D - - - - - E Y F S C E P A A L E L G C V V N D I R H I I V C G H S D C K A M N L L Y Q L R D P D - - - - - 118  
35 V F F T C M D S R M I P - - T R Y T D T H V G D M F V - - - - - V R N A G N L I P H A Q H F Q D - - - - - E Y F S C E P A A L E L G C V V N D I R H I I V C G H S D C K A M N L L Y Q L R D P E - - - - - 118  
35 V F F T C M D S R M I P - - T R Y T D T H V G D M F V - - - - - V R N A G N L I P H A Q H F Q D - - - - - E Y F S C E P A A L E L G C V V N D I R H I I V C G H S D C K A M N L L Y Q L R D P D - - - - - 118  
35 V F F T C M D S R M I P - - T R Y T D T H V G D M F V - - - - - V R N A G N L I P H A Q H F Q D - - - - - E Y F S C E P A A L E L G C V V N D I R H I I V C G H S D C K A M N L L Y Q L R D P D - - - - - 118  
35 V F F T C M D S R M I P - - T R Y T D T H V G D M F V - - - - - V R N A G N L I P H A Q H F Q D - - - - - E Y F S C E P A A L E L G C V V N D I R H I I V C G H S D C K A M N L L Y Q L R D P D - - - - - 118  
35 V F F T C M D S R M I P - - T R Y T D T H V G D M F V - - - - - V R N A G N L I P H A Q H F Q D - - - - - E Y F S C E P A A L E L G C V V N D I R H I I V C G H S D C K A M N L L Y Q L R D P D - - - - - 118  
35 V F F T C M D S R M I P - - T R Y T D T H V G D M F V - - - - - V R N A G N L I P H A Q H F Q D - - - - - E Y F S C E P A A L E L G C V V N D I R H I I V C G H S D C K A M N L L Y Q L R D P D - - - - - 118  
35 V F F T C M D S R M I P - - T R Y T D T H V G D M F V - - - - - V R N A G N L I P H A Q H F Q D - - - - - E Y F S C E P A A L E L G C V V N D I R H I I V C G H S D C K A M N L L Y Q L R D P D - - - - - 118  
46 T V I C C S D S R A P P - E Y L F N V N F G D I F V - - - - - V R S A G G V I G Q T E L - - - - - G S I E Y G V T H L K T P L I V L V S H T S C G A C T A A C Q R A H - - - - - 117  
46 T I I C C S D S R A P P - E Y L F N V N F G D I F V - - - - - V R S A G G V I G Q T E L - - - - - G S V E Y G V T H L K T P L I V L V S H T S C G A C T A A C Q R A H - - - - - 117  
46 T I I C C S D S R A P P - E Y L F N V N F G D I F V - - - - - V R S A G G V I G Q T E L - - - - - G S V E Y G V T H L K T P L I V L V S H T S C G A C T A A C K H A H - - - - - 117  
35 V F F T C M D S R M I P - - T R F T E T N V G D M F V - - - - - V R N P G N V V P H S O H F V D - - - - - E F T M C E S A A L E L G C V V N D I R H V I V C G H S D C K A M N L L Y A L R D E E - - - - - 118  
35 I F Y T C M D S R M I P - - T R F T E T S V G D M F V - - - - - V R N A G N L I P H S E H F V D - - - - - E M T S C E P A G L E L S C I I N D I K H V I V C G H S D C K A M N L L Y K L K S D K - - - - - 118  
38 V M F S C M D S K L V I - - T K M I N D V G Y M F L - - - - - V R N A G N L I P N N D S L S F - - - - - D S V T T E P A A L E L G C I I N N I H H V V C G H S D C K A M N L Y Q M D V S V - - - - - 121  
35 L W I G C S D S R V A A - E R L T G M I P G E L F V - - - - - H R N V A N Q I I Y T D L N - C - - - - - L S V I Q Y A V D V L N K D I I V C G H S D C K A M N L Y G G V A A S I A N P K - - - - - 109  
106 L W I G C S D S R V P A - N E I V G L Y P G D I F V - - - - - H R N I A N I V C N S D L N - A - - - - - L A V I Q Y A I D C L K V E H V I V S G H Y K G G V T A A L H E D R - - - - - 180  
106 L W I G C S D S R V P A - N E I V G L Y P G D I F V - - - - - H R N I A N I V C N S D L N - A - - - - - L A V I Q Y A I D C L K V E H V I V S G H Y K G G V T A A L H E D R - - - - - 180  
106 L W I G C S D S R V P A - N E I V G L Y P G D I F V - - - - - H R N I A N I V C N S D L N - A - - - - - L A V I Q Y A I D C L K V E H V I V S G H Y K G G V T A A L H E D R - - - - - 180  
106 L W I G C S D S R V P A - N E I V G L Y P G D I F V - - - - - H R N I A N I V C N S D L N - A - - - - - L A V I Q Y A I D C L K V E H V I V S G H Y K G G V T A A L H E D R - - - - - 180  
36 V L F T C M D A R I H P - - N V I M N S N V G D V F T - - - - - V R N P G N I V P N A S Y V A N - S - - - - - R T P A P E P A G L E L G C V V N S I K N V V V C G H S D C K A M I A L Q S F G D S K - - - - - 120  
35 V F F T C M D S R M I P - - T R F T E T N V G D M F V - - - - - V R N A G N I V P H S Q H F I D - - - - - E L T M C E P A A L E L G C V V N D I R H V I V C G H S D C K A M N L L Y A L R D E E - - - - - 118  
35 V L V A C V D C R I M P - - E T Y M S S E P G D M F V - - - - - V R T A G N L L P H A K L Y G D - - - - - V G S C S E L A A L Q M A I Q E G K V N E V V V C G H S N C K G M T F L L S H D S R - - - - - 117  
50 L L I G C S D S R A P P - N E I T E T D P G E I F I - - - - - H R N I A N L M I P T D L N - S - - - - - N C V I Q Y A V E H L N I H S I I V M G H T C G G I K A A M T Q Q S - - - - - 124  
50 L L I G C S D S R A P P - N E I T E T D P G E I F I - - - - - H R N I A N V V I P T D L N - I - - - - - N C V I Q Y A I E H L K V H N I V M G H T C G G I K A A M T Q Q S - - - - - 124  
50 L L I G C S D S R A P P - N E I T E T D P G E I F I - - - - - H R N I A N L V I P T D L N - L - - - - - N C V I Q Y A V E H L N I H S I I V M G H T C G G I K A A M T Q Q S - - - - - 124  
50 L L I G C S D S R A P P - N E I T E T D P G E I F I - - - - - H R N I A N I V I P T D L N - I - - - - - N C V I Q Y A I E H L K V H N I V M G H T C G G I K A A M T Q Q S - - - - - 124  
50 L L I G C S D S R A P P - N E I T E T D P G E I F I - - - - - H R N I A N L V I P T D L N - L - - - - - N C V I Q Y A V E H L H I H N I V M G H T C G G I K A A M T Q Q S - - - - - 124  
38 I L F T C M D S R M L P - - T R F C Q T N V G D M F M - - - - - V R N A G N L I P H S E L F C G - - - - - D S L N T E P A A L E L A C I K N D V N H V I V C G H S D C K A M N L L Y R I R N V T - - - - - 121  
34 A V V A C V D S R V L T - - S K L L C S N V G E L F I - - - - - I R N P G N F V C C E K S S L E H F - - - - - N E N C V I P G F L E L L L R C R I N D I I V C G H S D C K A M N L L N G L K C K H E K S H S Y L A H H E H Q P I N - - - - - 136  
35 V F F T C M D S R M I P - - T R F T E T N V G D M F V E P T K H Y V S D S L T E F T F S - - - - - V R N P G N V V P H S R H F V D - - - - - E F T M C E S A A L E L G C V V N D I K H V I V C G H S D C K A M N L L Y A L R D E E - - - - - 135  
45 V F F T C I D S R M I P - - T R F T M T N V G D M L I - - - - - T R N A G N L I P H A S Y D P - - - - - N A I T T E P A A L E L G C V I N N I K D V I V C G H S D C K A I G I L H G L R D P A - - - - - 128  
43 V L V T C M D G R L L P - - S R I F K A E R G E L L I - - - - - I R N P G N F V P H S C C E P S E G S E A P F P S G E L A G L Q L A I Q K M A I P D V I V C G H T C R A G E A L H R L P V S R - - - - - P T G 136  
52 L W I G C S D S R V P A - E A L T G L G P G Q V F V - - - - - H R N V A N Q I I Y T D L N - A - - - - - L S V I Q Y A V D I L K V K H I I V C G H S D C K A M N L L Y G G V K A A I Q N P K - - - - - 126  
52 L W I G C S D S R V P A - E A L T G L G S G Q V F V - - - - - H R K V A N Q I I Y T D L N - A - - - - - L S V I Q Y S V D I L K V K H I I E C G H Y S C G G V K A A I K N P K - - - - - 126  
60 L W I G C S D S R V P A - E R L T G T Y P G E L F V - - - - - H R N V A N Q V H T D L N - C - - - - - L S V V Q F A V D V L K V K H I I C G H Y S C G G V N A A I I N P K - - - - - 134  
74 L W I G C S D S R V A A - E R L T G T H P G E L F V - - - - - H R N V A N Q V I H T D L N - C - - - - - L S V V Q F A V D V L K V K H I I V C G H S D C K A M N L L Y G G V A A S I T N P K - - - - - 148  
65 L W I G C S D S R V P A - E Q L T G L G P G Q V F V - - - - - H R N V A N Q I I H T D L N - A - - - - - L S V V Q Y A V D V L K V K H I I C G H Y C G G V K A A I E N P K - - - - - 139  
68 L W I G C S D S R V S A - E T L T S L Q P G D I I V - - - - - H R N V A N Q V I H T D L N - C - - - - - L S A I Q G A V D F H K V E H I I C G H Y C G G V K A A A I N P K - - - - - 112  
74 L W I G C S D S R V P V - E K L V G L G P G E V F V - - - - - H R N V A N Q V I H T D L N - C - - - - - L S V I Q Y A V E V L K V K H I I C G H Y C G G V A A A F D N P Q - - - - - 148  
18 L W I G C V D S R V S P - - E R L T G M L P G Q L F V - - - - - Q R N V G N Q V I H T D L N - C - - - - - L S V V Q Y A V E V L K V R H I I V C G H Y N G S V K I A I T N Q - - - - - 92  
35 V F F T C I D S R M I P - - T R F T Q T N V G D M F V - - - - - V R N A G N I I P H S O H F L D - - - - - E L T N E P A A L E L G C V V N D I R H I I V C G H S D C K A I N L L Y K L Q D S E - - - - - 118  
35 I L F S C V D A R L I T - - S R V M Q L D I G D A Y M - - - - - V R N P G N M I P C S Y T C G K L Q Q N - - - - - A A G L S A S I E L A C L M N K V K D I V C G H S D C K A M N L L L S M O R P E - - - - - 123  
33 A I V T C M D T R L V N F A E D A I G V K R G E A T V - - - - - I K A A G N I W T T G L S D I - - - - - V V S L L V S I Y E L G Q E I F I M G H E C G M T H A S T D S L G A M - - - - - L K S G 117  
33 A I V T C M D T R L V S F V E D A I G V K R G E A T V - - - - - I K A A G N V W T T G L S D T - - - - - V V S L L V S I Y E L G A E I F I G H E A C G M T H A S T D S L S Q M - - - - - I K A G 117  
36 I F I T C M D S R V F P - - S N I A S I A P G E S I - - - - - V R N A G N I V P H S K L I Y E - - - - - R W T P A E A A A L E L A C V R N Q V S S V V V C G H S D C K A M D G L H S L G G T A - - - - - 119  
38 L F F T C I D S R M L P - - S R F T Q T N V G D M Y I - - - - - V R N V G N I P H S H M Y D R - L H E H - - - - - G I V T T E P A A M L L A C V T G S I R H V V V C G H S D C L A M K T L S G I H D E C - - - - - 125



|                                          |     |                                                                                                      |  |  |  |  |  |  |  |     |
|------------------------------------------|-----|------------------------------------------------------------------------------------------------------|--|--|--|--|--|--|--|-----|
| EW34693_Pelosinus_fermentans-BCA         | 163 | ----K DVP I H G L M F N P H T G E L E V V V N G Y ----                                               |  |  |  |  |  |  |  | 186 |
| F4WAG3_Acromyrmex_echinatus-BCA          | 210 | ----DLH I H A L W F D I Y T G D I Y Y F S R A N K R F ----                                           |  |  |  |  |  |  |  | 255 |
| J9K706_Acyrthosiphon_pisum-BCA1          | 210 | ----DLH I H A L W F D I Y T G D V H Y F S R Q S K Q F ----                                           |  |  |  |  |  |  |  | 255 |
| C4WVD8_Acyrthosiphon_pisum-BCA2          |     |                                                                                                      |  |  |  |  |  |  |  |     |
| J9J2Y3_Acyrthosiphon_pisum-BCA3          | 130 | ----DLH I H A L W F D I Y T G D I Y Y F S R Q S K Q F ----                                           |  |  |  |  |  |  |  | 175 |
| D4NWE5_Adineta_vaga-BCA2                 | 209 | ----ELQ V H A L W T D I Y K G E V Y M F S F K E K C F ----                                           |  |  |  |  |  |  |  | 253 |
| Q17N64_Aedes_egypti-BCA                  | 210 | ----DLH I H A L W F D I Y T G D I Y Y F S R R S K R F ----                                           |  |  |  |  |  |  |  | 255 |
| FC551456_Ancylostoma_caninum-BCA         | 214 | ----TV D L H A M W F D I F A G E M Y L F S K P R R K F ----                                          |  |  |  |  |  |  |  | 259 |
| E3X5Q8_Anopheles_darlingi-BCA            | 262 | ----DLH I H A L W F D I Y T G D I Y Y F S R R S K R F ----                                           |  |  |  |  |  |  |  | 307 |
| Q5TU56_Anopheles_gambiae-BCA             | 210 | ----DLH I H A L W F D I Y T G D I Y F F S R R S K R F ----                                           |  |  |  |  |  |  |  | 255 |
| H9KS29_Apis_mellifera-BCA                | 210 | ----DLH I H A L W F D I ----                                                                         |  |  |  |  |  |  |  | 220 |
| F1LE18_Ascaris_suum-BCA                  | 214 | ----Q A D L H A F W F Q I E T A E M H I F S H K O H K F ----                                         |  |  |  |  |  |  |  | 259 |
| G0MSW4_Caenorhabditis_brenneri-BCA1      | 210 | ----R L H I H G M W F D I Y K G E D Y L F S K D K K R F ----                                         |  |  |  |  |  |  |  | 270 |
| G0MRG1_Caenorhabditis_brenneri-BCA2      | 214 | ----TV D L H A M W F D I Y T G E M H M F S K P N K R F ----                                          |  |  |  |  |  |  |  | 259 |
| A8XKV0_Caenorhabditis_briggsae-BCA1      | 210 | ----N L H L H G A W F N I Y D G E V F L F S K D R K R F ----                                         |  |  |  |  |  |  |  | 270 |
| A8WN21_Caenorhabditis_briggsae-BCA2      | 214 | ----TV D L H A M W F D I Y T G E M H M F S K P N R F ----                                            |  |  |  |  |  |  |  | 259 |
| Q22460_Caenorhabditis_elegans-BCA1       | 210 | ----R L H I H G M W F D I Y K G E D Y L F S K D K K R F ----                                         |  |  |  |  |  |  |  | 270 |
| Q2YS41_Caenorhabditis_elegans-BCA2       | 214 | ----TV D L H A M W F D I Y T G E M H M F S K P N K Q F ----                                          |  |  |  |  |  |  |  | 259 |
| E3LDN3_Caenorhabditis_remanei-BCA1       | 226 | ----R L H I H G M W F D V Y T G D D Y L F S K D K K R F ----                                         |  |  |  |  |  |  |  | 286 |
| E3MK96_Caenorhabditis_remanei-BCA2       | 214 | ----TV D L H A M W F D I Y T G E M H M F S K P N R F ----                                            |  |  |  |  |  |  |  | 259 |
| C1C2M7_Caligus_clemensi-BCA              | 209 | ----Q S V A H G L W L S L S S G E A H F S K K D K A F ----                                           |  |  |  |  |  |  |  | 248 |
| E2ANQ9_Camponotus_floridanus-BCA         | 210 | ----DLH I H A L W F D I Y T G D I Y Y F S R A N K R F ----                                           |  |  |  |  |  |  |  | 255 |
| B0WKV7_Culex quinquefasciatus-BCA        | 210 | ----DLH I H A L W F D I Y T G D I Y Y F S R R S K R F ----                                           |  |  |  |  |  |  |  | 255 |
| G6D7Z4_Danaus_plexippus-BCA              | 209 | ----DLH I H A L W F D I Y T G D I Y Y F S R R A K R F ----                                           |  |  |  |  |  |  |  | 254 |
| E9GLB5_Daphnia_pulex-BCA                 | 210 | ----R V H L H A L W F D I Y T G D I Y V F S R Q O K R F ----                                         |  |  |  |  |  |  |  | 255 |
| J3JTM9_Dendroctonus_ponderosae-BCA       | 210 | ----Q L H I H A L W F D I Y T G E I Y Y F S R G A K R F ----                                         |  |  |  |  |  |  |  | 255 |
| B3LZ10_Drosophila_ananassae-BCA          | 210 | ----DLH I H A L W F D I Y T G D I Y Y F S R G A K R F ----                                           |  |  |  |  |  |  |  | 255 |
| B3P1V8_Drosophila_erecta-BCA             | 210 | ----DLH I H A L W F D I Y T G D I Y Y F S R G A K R F ----                                           |  |  |  |  |  |  |  | 255 |
| B4JHY1_Drosophila_grimshawi-BCA          | 210 | ----N L H I H A L W F D I Y T G D I Y Y F S R G A K R F ----                                         |  |  |  |  |  |  |  | 255 |
| Q9VHJ5_Drosophila_melanogaster-BCA       | 210 | ----DLH I H A L W F D I Y T G D I Y Y F S R G A K R F ----                                           |  |  |  |  |  |  |  | 255 |
| B4KDC1_Drosophila_mojavensis-BCA         | 210 | ----N L H I H A L W F D I Y T G D I Y Y F S R G A K R F ----                                         |  |  |  |  |  |  |  | 255 |
| B4GFA1_Drosophila_persimilis-BCA         | 210 | ----DLH I H A L W F D I Y T G D I Y Y F S R G A K Q F ----                                           |  |  |  |  |  |  |  | 255 |
| Q296E4_Drosophila_pseudoobscura-BCA      | 210 | ----DLH I H A L W F D I Y T G D I Y Y F S R G A K Q F ----                                           |  |  |  |  |  |  |  | 255 |
| B4HKY7_Drosophila_sechellia-BCA          | 210 | ----DLH I H A L W F D I Y T G D I Y Y F S R G A K R F ----                                           |  |  |  |  |  |  |  | 255 |
| B4QXC5_Drosophila_simulans-BCA           | 210 | ----DLH I H A L W F D I Y T G D I Y Y F S R G A K R F ----                                           |  |  |  |  |  |  |  | 255 |
| B4LZE7_Drosophila_virilis-BCA            | 210 | ----N L H V H A L W F D I Y T G D I Y Y F S R G A K R F ----                                         |  |  |  |  |  |  |  | 255 |
| B4NBB9_Drosophila_willistoni-BCA         | 210 | ----DLH I H A L W F D I Y T G D I Y Y F S R G A K C F ----                                           |  |  |  |  |  |  |  | 255 |
| B4PTY0_Drosophila_yakuba-BCA             | 210 | ----DLH I H A L W F D I Y T G D I Y Y F S R G A K R F ----                                           |  |  |  |  |  |  |  | 255 |
| B0E7M0_Entamoeba_dispar-BCA              | 169 | ----Q C N I V S M I Y N I E T G K C E V V Q ----                                                     |  |  |  |  |  |  |  | 188 |
| C4LXK3_Entamoeba_histolytica-BCA         | 169 | ----Q C N I V S M I Y N I E T G K C E V V Q ----                                                     |  |  |  |  |  |  |  | 188 |
| K2GQM0_Entamoeba_nuttalli-BCA            | 169 | ----Q C N I V S M I Y N I E T G K C E V V Q ----                                                     |  |  |  |  |  |  |  | 188 |
| E2B2Q1_Harpegnathos_saltator-BCA         | 210 | ----DLH I H A L W F D I Y T G D I Y Y F S R A N K R F ----                                           |  |  |  |  |  |  |  | 255 |
| HMELO15257_Heliconiuss_melpomene-BCA     | 209 | ----DLH I H A L W F D I Y T G D I Y Y F S R R A K R F ----                                           |  |  |  |  |  |  |  | 254 |
| EY481200_Hirudo_medicalis-BCA            | 209 | ----K V R L H A L W I D V Y T G D F H M F C R D S N R F ----                                         |  |  |  |  |  |  |  | 255 |
| G0QP99_Ichthyophthirius_multifiliis-BCA  | 169 | ----Q V V N I H G W I Y G V N D G R L R D L A I T C S N L ----                                       |  |  |  |  |  |  |  | 210 |
| E9B853_Leishmania_donovani-BCA           | 256 | N K P E N E V E I H G W Y Y G L E D G L I R P L L T L N R R S ----                                   |  |  |  |  |  |  |  | 306 |
| A4HSV2_Leishmania_infantum-BCA           | 256 | N K P E N E V E I H G W Y Y G L E D G L I R P L L T L N R R S ----                                   |  |  |  |  |  |  |  | 306 |
| Q4QJ17_Leishmania_major-BCA              | 256 | N K P E N E V E I H G W Y Y G L E D G L I R P L L T L N R R S ----                                   |  |  |  |  |  |  |  | 306 |
| E9AKU0_Leishmania_mexicana-BCA           | 256 | N K P E N E V E I H G W Y Y G L E D G L I R P L L T L N R R S ----                                   |  |  |  |  |  |  |  | 306 |
| D3P148_Lepeophtheirus_salmonis-BCA1      | 209 | ----T A F V H G L W F S L T T G D V H Y F L K N E K V F ----                                         |  |  |  |  |  |  |  | 251 |
| K71WK8_Nasonia_vitripennis-BCA           | 210 | ----N L H V H A L W F D I Y T G D I Y Y F S R A N K R F ----                                         |  |  |  |  |  |  |  | 255 |
| A75717_Nematostella_vectensis-BCA        | 203 | ----A L N I Y G L W F D I K E G E M Y M F S R K O K K F ----                                         |  |  |  |  |  |  |  | 244 |
| A0BD61_Paramecium_tetraurelia-BCA1       | 186 | ----N P I M V H G W L F R V E T G Y I E E L L I D S Q T P ----                                       |  |  |  |  |  |  |  | 289 |
| A0E8j0_Paramecium_tetraurelia-BCA2       | 186 | ----H P V M V H G W L F R V E T G Y I E E L L I E E S I P ----                                       |  |  |  |  |  |  |  | 297 |
| A0CEX6_Paramecium_tetraurelia-BCA3       | 186 | ----N P I M V H G W L F R V E T G Y I E E L L I D S Q T P ----                                       |  |  |  |  |  |  |  | 289 |
| A0BDB1_Paramecium_tetraurelia-BCA4       | 186 | ----H P V M V H G W L F R V E T G Y I E E L L S L E D S I P ----                                     |  |  |  |  |  |  |  | 291 |
| A0C922_Paramecium_tetraurelia-BCA5       | 186 | ----N P V M V H G W L F R V E T G Y I E E L L I D Q H T P ----                                       |  |  |  |  |  |  |  | 288 |
| 187043763_Saccoglossus_kowalewskii-BCA   | 209 | ----R V R L H A M W V ----                                                                           |  |  |  |  |  |  |  | 217 |
| G4V6B2_Schistosoma_mansonii-BCA          | 226 | ----V L R V H G M W F E F Y S E R F ----                                                             |  |  |  |  |  |  |  | 241 |
| E9P13_Solenopsis_invicta-BCA             | 227 | ----DLH I H A L W F D I Y T G D I Y Y F S R A N K R F ----                                           |  |  |  |  |  |  |  | 272 |
| SMAR006741_Strigamia_maritima-BCA        | 220 | ----S I H I H A F W F D I Y T G D L Y Y F S R Q K R F ----                                           |  |  |  |  |  |  |  | 261 |
| H31177_Strongylocentrotus_purpuratus-BCA | 229 | ----Q I R L H A T F Y D T F S G N Y V F N Q K G R F ----                                             |  |  |  |  |  |  |  | 275 |
| Q22U21_Tetrahymena_thermophila-BCA1      | 187 | ----Q D I S I H A W I Y S L E N G I T E L D Y A A S S R ----                                         |  |  |  |  |  |  |  | 263 |
| Q22U16_Tetrahymena_thermophila-BCA2      | 177 | ----Q Y Y K I H G I E D K I Y Q Q M L G F I V Q K M V V L N Q T M Q Q V Q E K F L K L I K M Q I ---- |  |  |  |  |  |  |  | 251 |
| I7MDL7_Tetrahymena_thermophila-BCA3      | 194 | ----Q S L Y I H G W I Y G I D N G R V N D L N L S A G N L ----                                       |  |  |  |  |  |  |  | 250 |
| I7LWM1_Tetrahymena_thermophila-BCA4      | 200 | ----Q Q V Y I H G W I Y G V K D G R V T D L D L Q A C N S ----                                       |  |  |  |  |  |  |  | 302 |
| I7M0M0_Tetrahymena_thermophila-BCA5      | 200 | ----Q E I T I H A W I Y S L K D G T I T E L D Y A A S S R ----                                       |  |  |  |  |  |  |  | 270 |
| I7MD92_Tetrahymena_thermophila-BCA6      | 172 | ----Q K I Q I H G W Y Y G L E D G R I K D L N I S S N Y ----                                         |  |  |  |  |  |  |  | 215 |
| I7M748_Tetrahymena_thermophila-BCA7      | 209 | ----Q E V T I H G W I Y G L K D G R V K E I D Y A A N S K ----                                       |  |  |  |  |  |  |  | 288 |
| Q23AV1_Tetrahymena_thermophila-BCA8      | 152 | ----Q L V Y I H G W Y Y G V Q D G L V R D L N I S S C S L ----                                       |  |  |  |  |  |  |  | 280 |
| D6WK56_Tribolium_castaneum-BCA           | 210 | ----Q L H I H A L W F D I Y T G E I Y Y F S R G A K K F ----                                         |  |  |  |  |  |  |  | 255 |
| E55H53_Trichinella_spiralis-BCA          | 210 | ----L A K L I S E K H K V E D G I L L I T N E S S Q ----                                             |  |  |  |  |  |  |  | 264 |
| A2ENQ8_Trichomonas_vaginalis-BCA1        | 159 | ----K N I P I H G L L I H P D T G K V T T I I N G Y ----                                             |  |  |  |  |  |  |  | 182 |
| A2DLG4_Trichomonas_vaginalis-BCA2        | 159 | ----K N I P I H G L V I N P D T G K L T T I V N G Y N K ----                                         |  |  |  |  |  |  |  | 184 |
| B355Y1_Trichoplax_adhaerens-BCA          | 207 | ----T V K L Y S L W F D I K D A T C Y V F N K R D K L F ----                                         |  |  |  |  |  |  |  | 252 |
| 117195962_Xenoturbella_bocki-BCA         | 213 | ----E V R L H A M W F D I Y T G D H Y M F Q Q N T G N G ----                                         |  |  |  |  |  |  |  | 250 |
